# Supplementary material for: Incisive analysis of hydrogen-bonded supramolecular architectures in designer polycyclitols: observation of some interesting self-assembly patterns
Source: Royal Society of Chemistry journal article supplement (doi:10.1039/d4ce00010b), 2024-01-01
Supplement: d4ce00010b1.pdf [file d4ce00010b1.pdf]

## Supporting Information

### Incisive Analysis of Hydrogen-Bonded Supramolecular Architectures in designer Polycyclitols: Observation of Some Interesting Self-Assembly Patterns

Showkat Rashid,<sup>a,b,c,†</sup> Ahmad Husain,<sup>d,†</sup> Bilal A. Bhat <sup>\*c,e</sup> and Goverdhan Mehta <sup>\*b</sup>

<sup>a</sup> Natural Products & Medicinal Chemistry Division, CSIR-Indian Institute of Integrative Medicine (IIIM), Jammu, Jammu and Kashmir 180001, India.

<sup>b</sup> School of Chemistry, University of Hyderabad, Hyderabad-500046, India.

<sup>c</sup> Academy of Scientific and Innovative Research (AcSIR), Ghaziabad-201002, India.

<sup>d</sup> Department of Chemistry, DAV University Jalandhar, Punjab-144012, India.

<sup>e</sup> Natural Products & Medicinal Chemistry Division, CSIR-Indian Institute of Integrative Medicine, Sanat Nagar, Srinagar 190005, India.

<sup>†</sup> These authors contributed equally.

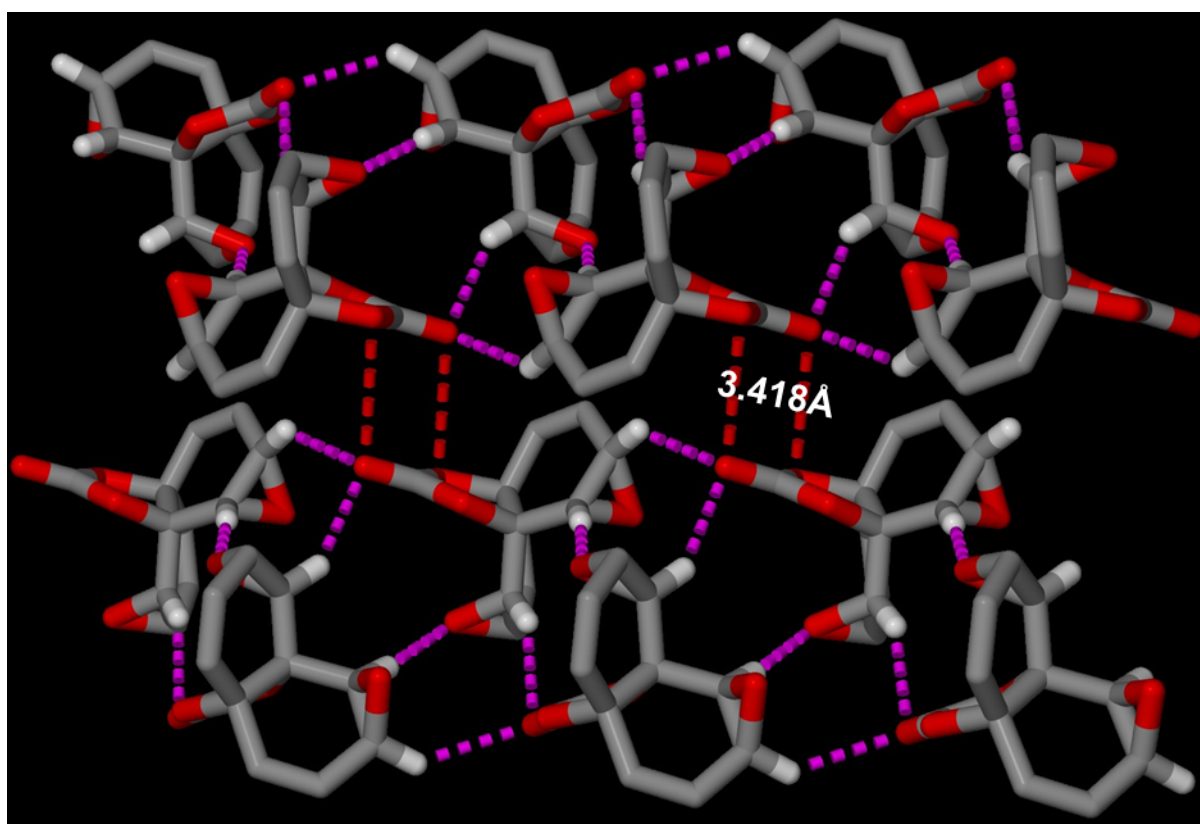

Fig. S1. The C–H...O interactions connecting neighbouring molecules to form 1D chain in the packing diagram of **10**. The 1D chains are further stacks up through cyclic dipolar interactions between the neighbouring symmetry generated molecules of **10**.

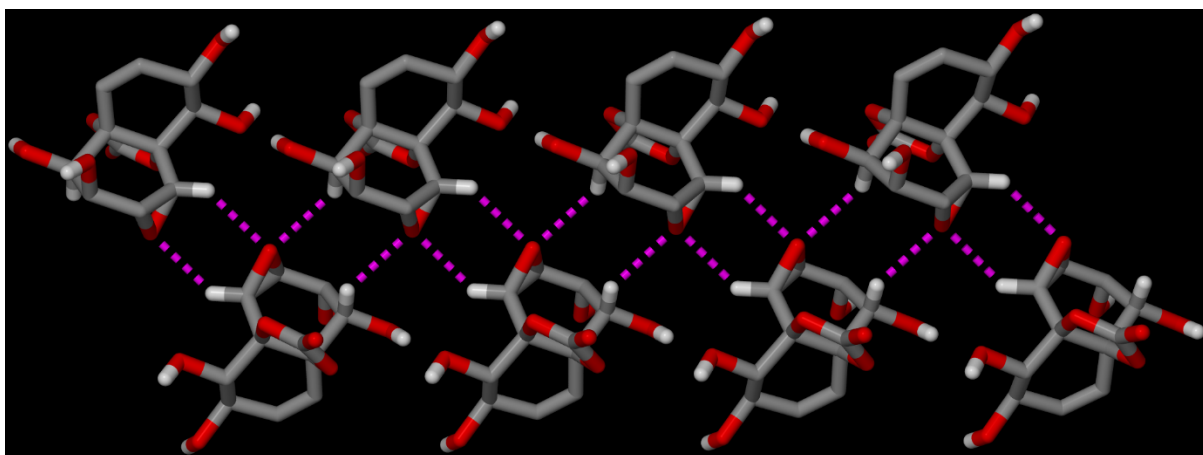

Fig. S2. Packing diagram of **11** displaying involvement of epoxide in C-H...O interactions resulting in the formation of 1D-ribbon.

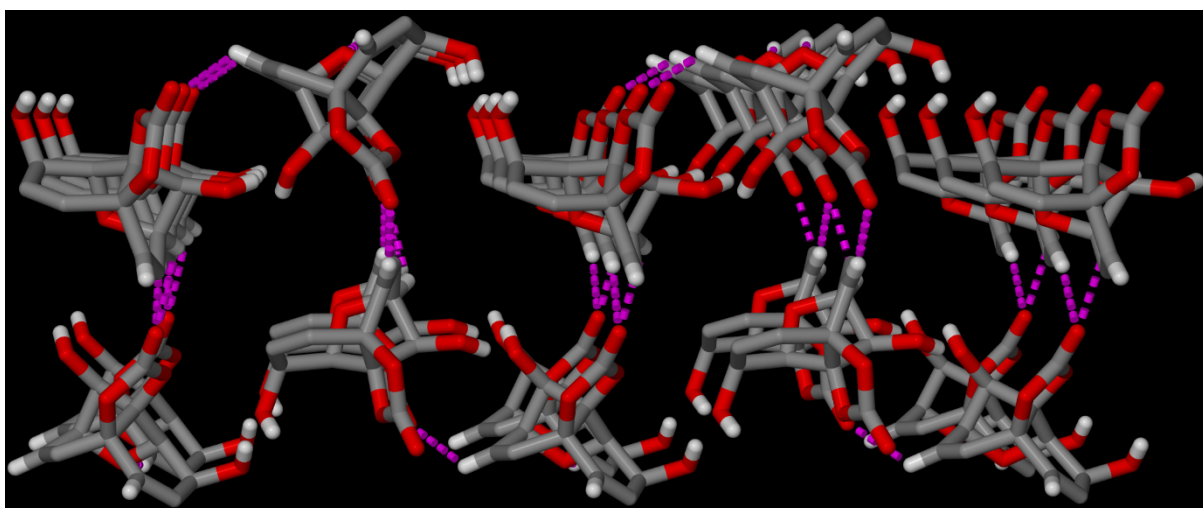

Fig. S3. The C-H...O interactions forming 2D sheets parallel to the *bc*-plane in the packing diagram of **12**.

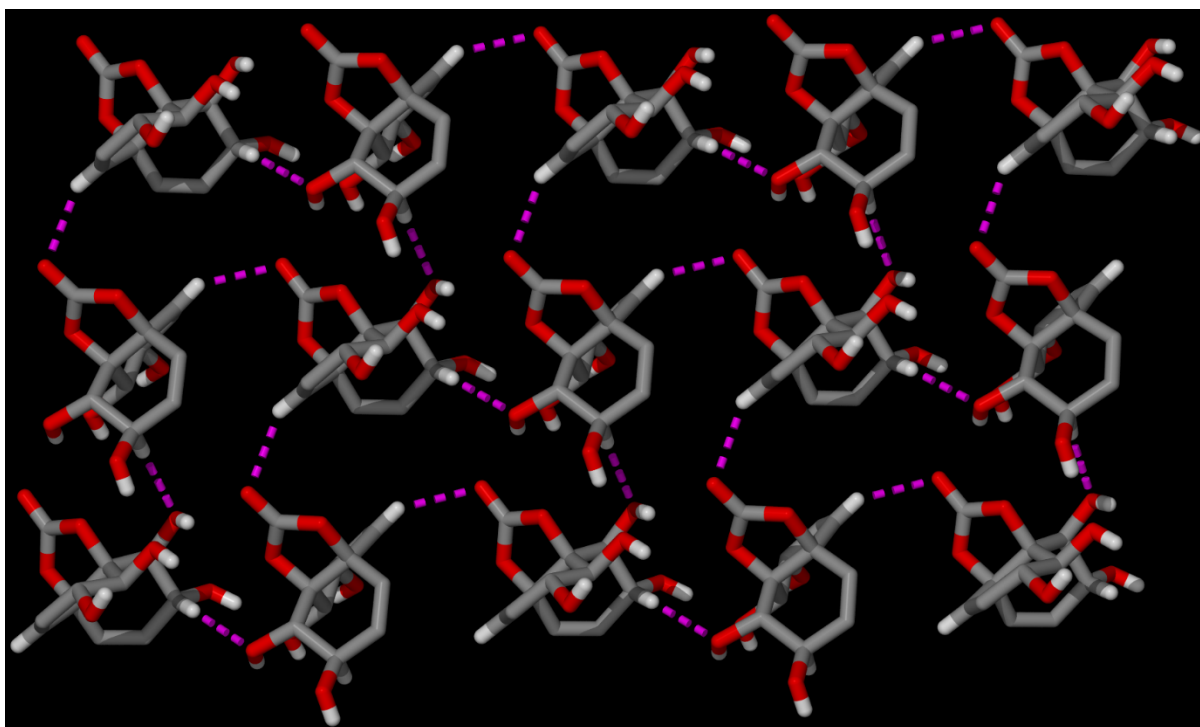

Fig. S4. The C-H...O interactions form 2D sheets viewing down  $a$ -axis in the packing diagram of **13**.

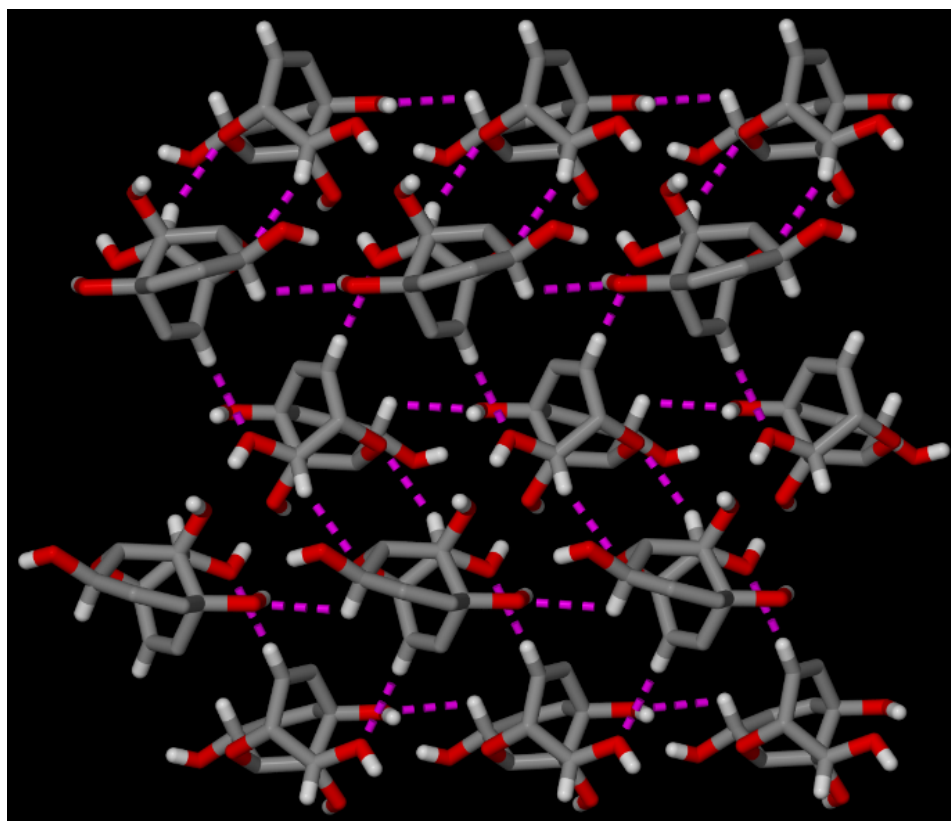

Fig. S5. The C-H...O interactions form 2D sheets viewing down the  $a$ -axis in the packing diagram of **14**.

## Hirshfeld surface analysis

The Hirshfeld surface is unique<sup>1</sup> and facilitates a novel method to visualize the intermolecular interaction of molecular crystals by colour-coding short or long contacts, the colour intensity indicating the relative strength of the interactions. The Hirshfeld surfaces have been mapped over  $d_{\text{norm}}$  (-1.281 to 1.417 Å) and identify the occurrence of different kinds of intermolecular interactions, which were generated using Crystal Explorer 3.0.<sup>2</sup> The function  $d_{\text{norm}}$  is a ratio encompassing the distances  $d_i$  and  $d_e$ . The  $d_e$  is the distance from the point to the nearest nucleus external to the surface and  $d_i$  is the distance to the nearest nucleus internal to the surface.

**Table S1.** Crystal data and structure refinements for polycyclitols **10-14**.

|                                           | <b>10</b>                                                          | <b>11</b>                                                        | <b>12</b>                                                          | <b>13</b>                                                          | <b>14</b>                                                          |
|-------------------------------------------|--------------------------------------------------------------------|------------------------------------------------------------------|--------------------------------------------------------------------|--------------------------------------------------------------------|--------------------------------------------------------------------|
| CCDC number                               | 1885547                                                            | 1886483                                                          | 2164511                                                            | 2164510                                                            | 1885526                                                            |
| Empirical formula                         | C <sub>11</sub> H <sub>10</sub> O <sub>6</sub>                     | C <sub>11</sub> H <sub>12</sub> O <sub>8</sub>                   | C <sub>11</sub> H <sub>12</sub> O <sub>7</sub>                     | C <sub>11</sub> H <sub>12</sub> O <sub>7</sub>                     | C <sub>10</sub> H <sub>12</sub> O <sub>5</sub>                     |
| Formula weight                            | 238.19                                                             | 272.21                                                           | 256.21                                                             | 256.21                                                             | 212.20                                                             |
| Crystal system                            | monoclinic                                                         | triclinic                                                        | monoclinic                                                         | orthorhombic                                                       | monoclinic                                                         |
| Space group                               | $P2_1/n$                                                           | $P\bar{1}$                                                       | $P2_1/n$                                                           | $Pca2_1$                                                           | $P2_1/n$                                                           |
| $a$ [Å]                                   | 11.1420(14)                                                        | 7.1276(8)                                                        | 6.5680(2)                                                          | 12.0789(3)                                                         | 10.7437(12)                                                        |
| $b$ [Å]                                   | 6.8138(8)                                                          | 7.5031(8)                                                        | 27.9778(8)                                                         | 10.0528(2)                                                         | 6.9554(7)                                                          |
| $c$ [Å]                                   | 13.6024(17)                                                        | 11.3065(13)                                                      | 12.4818(4)                                                         | 8.6569(2)                                                          | 12.3782(14)                                                        |
| $\alpha$ [°]                              | 90                                                                 | 98.614(6)                                                        | 90                                                                 | 90                                                                 | 90                                                                 |
| $\beta$ [°]                               | 102.714(4)                                                         | 105.390(7)                                                       | 92.584(3)                                                          | 90                                                                 | 92.629(4)                                                          |
| $\gamma$ [°]                              | 90                                                                 | 105.364(7)                                                       | 90                                                                 | 90                                                                 | 90                                                                 |
| Volume [Å <sup>3</sup> ]                  | 1007.4(2)                                                          | 546.16(11)                                                       | 2291.30(12)                                                        | 1051.17(5)                                                         | 924.01(17)                                                         |
| $Z$                                       | 4                                                                  | 2                                                                | 8                                                                  | 4                                                                  | 4                                                                  |
| $\rho_{\text{calc}}$ [g/cm <sup>3</sup> ] | 1.571                                                              | 1.655                                                            | 1.485                                                              | 1.619                                                              | 1.525                                                              |
| $\mu$ [mm <sup>-1</sup> ]                 | 0.130                                                              | 0.144                                                            | 0.126                                                              | 0.138                                                              | 0.123                                                              |
| $F(000)$                                  | 496                                                                | 284                                                              | 1072                                                               | 536                                                                | 448                                                                |
| Radiation                                 | MoK $\alpha$<br>( $\lambda=0.71073$ Å)                             | MoK $\alpha$<br>( $\lambda=0.71073$ Å)                           | Mo K $\alpha$<br>( $\lambda=0.71073$ Å)                            | MoK $\alpha$<br>( $\lambda=0.71073$ Å)                             | Mo K $\alpha$<br>( $\lambda=0.71073$ Å)                            |
| 2 $\theta$ range [°]                      | 5.34 to 55.93<br>(0.76 Å)                                          | 6.15 to 50.05<br>(0.84 Å)                                        | 4.38 to 54.56<br>(0.78 Å)                                          | 6.75 to 50.04<br>(0.84 Å)                                          | 5.14 to 50.04<br>(0.84 Å)                                          |
| Index ranges                              | -14 $\leq h \leq$ 14<br>-8 $\leq k \leq$ 8<br>-17 $\leq l \leq$ 17 | -8 $\leq h \leq$ 8<br>-8 $\leq k \leq$ 8<br>-13 $\leq l \leq$ 13 | -8 $\leq h \leq$ 8<br>-35 $\leq k \leq$ 34<br>-15 $\leq l \leq$ 16 | -7 $\leq h \leq$ 14<br>-11 $\leq k \leq$ 11<br>-10 $\leq l \leq$ 5 | -12 $\leq h \leq$ 12<br>-8 $\leq k \leq$ 8<br>-14 $\leq l \leq$ 14 |
| Reflections collected                     | 30428                                                              | 15484                                                            | 20101                                                              | 2391                                                               | 15915                                                              |
| Independent reflections                   | 2409<br>$R_{\text{int}} = 0.0888$<br>$R_{\text{sigma}} = 0.0396$   | 1815<br>$R_{\text{int}} = 0.0663$<br>$R_{\text{sigma}} = 0.0366$ | 4879<br>$R_{\text{int}} = 0.0597$<br>$R_{\text{sigma}} = 0.0523$   | 1329<br>$R_{\text{int}} = 0.0159$<br>$R_{\text{sigma}} = 0.0236$   | 1606<br>$R_{\text{int}} = 0.0235$<br>$R_{\text{sigma}} = 0.0123$   |
| Completeness to $\theta = 25.242^\circ$   | 99.9 %                                                             | 94.6 %                                                           | 100.0 %                                                            | 99.9 %                                                             | 98.7 %                                                             |
| Data / Restraints / Parameters            | 2409/0/156                                                         | 1815/0/176                                                       | 4879/0/335                                                         | 1329/1/167                                                         | 1606/0/140                                                         |
| Goodness-of-fit on $F^2$                  | 1.067                                                              | 1.143                                                            | 1.091                                                              | 1.092                                                              | 1.097                                                              |
| Final $R$ indexes [ $\geq 2\sigma(I)$ ]   | $R_1 = 0.0502$<br>$wR_2 = 0.1093$                                  | $R_1 = 0.0759$<br>$wR_2 = 0.1990$                                | $R_1 = 0.0504$<br>$wR_2 = 0.1278$                                  | $R_1 = 0.0284$<br>$wR_2 = 0.0709$                                  | $R_1 = 0.0350$<br>$wR_2 = 0.0867$                                  |
| Final $R$ indexes [all data]              | $R_1 = 0.0756$<br>$wR_2 = 0.1188$                                  | $R_1 = 0.1028$<br>$wR_2 = 0.2219$                                | $R_1 = 0.0733$<br>$wR_2 = 0.1414$                                  | $R_1 = 0.0306$<br>$wR_2 = 0.0723$                                  | $R_1 = 0.0365$<br>$wR_2 = 0.0878$                                  |
| Largest peak/hole [eÅ <sup>-3</sup> ]     | 0.24/-0.26                                                         | 0.95/-0.32                                                       | 0.22/-0.28                                                         | 0.13/-0.18                                                         | 0.28/-0.15                                                         |

**Table S2.** Hydrogen bond parameter for **10-14**

| D–H···A [Å]                                                                                                                                                                                  | d(H···A) [Å] | d(D···A) [Å] | <(DHA) [°] |
|----------------------------------------------------------------------------------------------------------------------------------------------------------------------------------------------|--------------|--------------|------------|
| <b>10</b>                                                                                                                                                                                    |              |              |            |
| O2–H2···O6 <sup>#1</sup>                                                                                                                                                                     | 2.08         | 2.829(2)     | 151        |
| C2–H2A···O6 <sup>#2</sup>                                                                                                                                                                    | 2.53         | 3.473(2)     | 161        |
| C2–H2A···O2 <sup>#3</sup>                                                                                                                                                                    | 2.66         | 3.393(2)     | 131        |
| C3–H3···O2 <sup>#4</sup>                                                                                                                                                                     | 2.64         | 3.443(2)     | 145        |
| O1–H1···O2 <sup>#5</sup>                                                                                                                                                                     | 2.01         | 2.803(2)     | 162        |
| Symmetry codes: #1: 1-x, 2-y, 1-z; #2: -1/2+x, 3/2-y, -1/2+z, #3: -x+1/2, y-1/2, -z+1/2, #4: -x+1/2, y+1/2, -z+1/2, #5: 1/2-x, -1/2+y, 1/2-z.                                                |              |              |            |
| <b>11</b>                                                                                                                                                                                    |              |              |            |
| O1–H1···O2 <sup>#1</sup>                                                                                                                                                                     | 1.94         | 2.732(5)     | 164        |
| O2–H2···O8 <sup>#2</sup>                                                                                                                                                                     | 1.90         | 2.700(5)     | 166        |
| O3–H3···O1 <sup>#3</sup>                                                                                                                                                                     | 2.00         | 2.815(5)     | 172        |
| O4–H4···O3 <sup>#4</sup>                                                                                                                                                                     | 1.95         | 2.762(5)     | 172        |
| C8–H8···O5 <sup>#5</sup>                                                                                                                                                                     | 2.47         | 3.261(7)     | 137        |
| C4–H4A···O8 <sup>#6</sup>                                                                                                                                                                    | 2.635        | 3.526(7)     | 161        |
| Symmetry codes: #1: 1-x, 2-y, -z; #2: 1+x, 1+y, z; #3: x, -1+y, z; #4: 2-x, 1-y, 1-z; #5: -x+1, -y+2, -z+1; #6: x+1, y, z                                                                    |              |              |            |
| <b>12</b>                                                                                                                                                                                    |              |              |            |
| O1–H1···O14 <sup>#1</sup>                                                                                                                                                                    | 1.85         | 2.664(2)     | 174        |
| O2–H2···O8                                                                                                                                                                                   | 1.91         | 2.713(2)     | 168        |
| O7–H7A···O1 <sup>#2</sup>                                                                                                                                                                    | 1.96         | 2.728(2)     | 156        |
| O8–H8A···O13 <sup>#3</sup>                                                                                                                                                                   | 1.87         | 2.674(3)     | 166        |
| O13–H13A···O2                                                                                                                                                                                | 1.94         | 2.785(2)     | 173        |
| O13–H13B···O2 <sup>#4</sup>                                                                                                                                                                  | 2.10         | 2.925(3)     | 163        |
| O14–H14A···O9 <sup>#5</sup>                                                                                                                                                                  | 2.13         | 2.964(2)     | 168        |
| O14–H14B···O7                                                                                                                                                                                | 2.11         | 2.949(2)     | 168        |
| C17–H17···O6                                                                                                                                                                                 | 2.59         | 3.289(3)     | 132        |
| C16–H16···O9 <sup>#6</sup>                                                                                                                                                                   | 2.66         | 3.455(3)     | 143        |
| C5–H5···O3 <sup>#6</sup>                                                                                                                                                                     | 2.41         | 3.284(2)     | 157        |
| C15–H15···O6 <sup>#7</sup>                                                                                                                                                                   | 2.51         | 3.431(2)     | 169        |
| C1–H1A···O5 <sup>#8</sup>                                                                                                                                                                    | 2.66         | 3.419(2)     | 134        |
| C7–H7···O12 <sup>#9</sup>                                                                                                                                                                    | 2.42         | 3.322(3)     | 153        |
| Symmetry codes: #1: 1+x, y, -1+z; #2: x, y, 1+z; #3: -1+x, y, z; #4: 2-x, 1-y, 1-z; #5: -1/2+x, 3/2-y, 1/2+z; #6: x-1, y, z; #7: x-1/2, -y+1/2+1, z+1/2; #8: x+1, y, z; #9: -x+1, -y+1, -z+1 |              |              |            |
| <b>13</b>                                                                                                                                                                                    |              |              |            |
| O1–H1···O4                                                                                                                                                                                   | 2.12         | 2.739(3)     | 132        |
| O1–H1···O7 <sup>#1</sup>                                                                                                                                                                     | 2.35         | 3.016(3)     | 139        |
| O2–H2···O4 <sup>#1</sup>                                                                                                                                                                     | 1.95         | 2.765(3)     | 170        |
| O3–H3···O1 <sup>#2</sup>                                                                                                                                                                     | 2.05         | 2.867(3)     | 177        |
| O4–H4···O2 <sup>#2</sup>                                                                                                                                                                     | 1.91         | 2.717(3)     | 169        |
| C2–H2A···O1 <sup>#1</sup>                                                                                                                                                                    | 2.56         | 3.538(3)     | 161        |
| C1–H1A···O2 <sup>#3</sup>                                                                                                                                                                    | 2.65         | 3.487(3)     | 144        |
| C7–H7···O3 <sup>#4</sup>                                                                                                                                                                     | 2.65         | 3.527(4)     | 149        |
| C5–H5···O7 <sup>#5</sup>                                                                                                                                                                     | 2.56         | 3.323(3)     | 140        |
| Symmetry codes: #1: 1-x, 2-y, 1/2+z; #2: 1/2+x, 2-y, z; #3: 1/2-x, y, 1/2+z; #4: -x-1/2, y, z-1/2; #5: 1-x, 1-y, z+1/2.                                                                      |              |              |            |
| <b>14</b>                                                                                                                                                                                    |              |              |            |
| O1–H1···O4 <sup>#1</sup>                                                                                                                                                                     | 1.90         | 2.717(1)     | 177        |
| O2–H2···O5 <sup>#2</sup>                                                                                                                                                                     | 2.00         | 2.748(2)     | 151        |
| O4–H4···O2 <sup>#3</sup>                                                                                                                                                                     | 1.94         | 2.708(2)     | 156        |
| O5–H5···O1                                                                                                                                                                                   | 2.09         | 2.741(2)     | 136        |
| C1–H1A···O3 <sup>#4</sup>                                                                                                                                                                    | 2.53         | 3.415(2)     | 151        |
| C6–H6···O1 <sup>#5</sup>                                                                                                                                                                     | 2.69         | 3.614(2)     | 172        |
| C3–H3···O1 <sup>#6</sup>                                                                                                                                                                     | 2.49         | 3.410(2)     | 169        |
| Symmetry codes: #1: 1-x, -y, 1-z; #2: x, 1+y, z; #3: 3/2-x, -1/2+y, 3/2-z; #4: -x+1, -y+1, -z+1; #5: x+1/2, -y+1/2, z+1/2; #6: -x+1/2+1, y+1/2, -z+1/2.                                      |              |              |            |

**References**

1. J. J. McKinnon, M. A. Spackman and A. S. Mitchell, *Acta Crystallogr., Sect. B: Struct. Sci.*, 2004, 60, 627–668.
2. S.K. Wolff, D.J. Grimwood, J.J. McKinnon, M.J. Turner, D. Jayatilaka, M.A. Spackman, *CrystalExplorer (Version 3.0)*, University of Western Australia, 2012.
